# Supplementary material for: Multivalent supramolecular assembly with ultralong organic room temperature phosphorescence, high transfer efficiency and ultrahigh antenna effect in water
Source: Royal Society of Chemistry journal article supplement (doi:10.1039/d1sc05861d), 2021-11-24
Supplement: d1sc05861d1.pdf [file d1sc05861d1.pdf]

## Electronic Supplementary Information

# Multivalent Supramolecular Assembly with Ultralong Organic Room Temperature Phosphorescence, High Transfer Efficiency and Ultrahigh Antenna Effect in Water

Wei-Lei Zhou<sup>a,b</sup>, Wenjing Lin<sup>a</sup>, Yong Chen<sup>a</sup>, Xian-Yin Dai<sup>a</sup>, Zhixue Liu<sup>a</sup> and Yu Liu<sup>a\*</sup>

<sup>a</sup>Department of Chemistry, State Key Laboratory of Elemento-Organic Chemistry, Nankai University

<sup>b</sup>College of Chemistry and Materials Science, Inner Mongolia Key Laboratory of Chemistry for Nature Products and Synthesis for Functional Molecules, Inner Mongolia Minzu University, Tongliao 028000, People's Republic of China

## Table of Contents

**Fig. S1.** Zeta potential results of (a) HABr, (b) HABr/CB[8], (c) LP and (d) HABr/CB[8]/LP ([HABr] = 0.1 mM, [CB[8]] = 0.05 mM, [LP] = 0.02 wt %, 298 K).

**Fig. S2.** Phosphorescence spectra of (a) HABr/CB[8] and HABr/CB[8]/SP/LP(sodium polyacrylate = SP); (b) HABr/CB[8] and HABr/CB[8]/SA/LP(sodium alginate = SA) in water ([HABr] = 0.1 mM, [CB[8]] = 0.05 mM, [LP] = 0.02 wt %, [SP] = 0.02 wt %, [SA] = 0.02 wt %,  $\lambda_{ex}$  = 300 nm).

**Fig. S3.** Phosphorescence lifetime decay fitting curves of (a) HABr/CB[8] and (b) HABr/CB[8]/LP at 500 nm at 298 K.

**Fig. S4.** The quantum yield of (a) HABr/CB[8] and (b) HABr/CB[8]/LP in aqueous solution

**Fig. S5.** SEM image of (a) HABr/CB[8], (b) HABr/CB[8]/LP and TEM image of (c) HABr/CB[8], (d) HABr/CB[8]/LP.

**Fig. S6.** Phosphorescence lifetime decay fitting curve of (a) HABr/CB[8]/LP/RhB measured for 500 nm at 298 K and (b) HABr/CB[8]/LP/SR101 measured for 500 nm at 298 K.

**Fig. S7.** Fluorescence lifetime decay fitting curve of (a) RhB, (b) SR101. Phosphorescence lifetime decay fitting curve of (c) HABr/CB[8]/LP/RhB measured for 585 nm at 298 K, (d) HABr/CB[8]/LP/SR101 measured for 612 nm at 298 K.

**Fig. S8.** Phosphorescence spectra of (a) HABr/CB[8]/LP and HABr/CB[8]/LP/RhB; (c) HABr/CB[8]/LP and HABr/CB[8]/LP/SR101 in water ( $\lambda_{ex}$  = 300 nm). The normalized phosphorescence spectra of (b) HABr/CB[8]/LP (red line,  $\lambda_{ex}$  = 300 nm), HABr/CB[8]/LP/RhB (blue line,  $\lambda_{ex}$  = 300 nm), HABr/CB[8]/LP/RhB (black line,  $\lambda_{ex}$  = 550 nm) and (d) HABr/CB[8]/LP (red line,  $\lambda_{ex}$  = 300 nm), HABr/CB[8]/LP/SR101 (blue line,  $\lambda_{ex}$  = 300 nm), HABr/CB[8]/LP/SR101 (black line,  $\lambda_{ex}$  = 580 nm) in water.

**Table S1.** Energy transfer efficiency ( $\Phi_{ET}$ ) and antenna effect of RTP reported in the literature.

**Fig. S9.** (a) Phosphorescence spectrum (delayed 0.2 ms) of HABr/CB[8] in aqueous solution with different concentrations of SR101. Phosphorescence spectra of (b) HABr/CB[8] and HABr/CB[8]/SR101. The normalized phosphorescence spectra of (c) HABr/CB[8] (red line,  $\lambda_{ex} = 300$  nm), HABr/CB[8]/SR101 (red line,  $\lambda_{ex} = 300$  nm), HABr/CB[8]/SR101 (black line,  $\lambda_{ex} = 580$  nm). (d) Phosphorescence spectrum (delayed 0.2 ms) of RhB and SR101 in aqueous solution.

**Fig. S10.** (a) Phosphorescence spectrum (delayed 0.2 ms) and (b) Antenna effect/ $\Phi_{ET}$  of HABr/CB[8] in aqueous solution with different concentrations of RhB. Phosphorescence spectra of (c) HABr/CB[8] and HABr/CB[8]/RhB. The normalized phosphorescence spectra of (b) HABr/CB[8] (red line,  $\lambda_{ex} = 300$  nm), HABr/CB[8]/RhB (red line,  $\lambda_{ex} = 300$  nm), HABr/CB[8]/RhB (black line,  $\lambda_{ex} = 550$  nm).

**Fig. S11.** The photographs writing “102” with HABr/CB[8]/0.005SR101 on the filter paper under UV light.

**Fig. S12.** Phosphorescence spectra of HABr/CB[8]/LP at different delay times for 0.2 ms, 0.6 ms, 1.0 ms, 1.4 ms, 2.2 ms, 4.2 ms, respectively in water at 298 K (Ex. Slit = 5 nm, Em. Slit = 10 nm, [HABr] = 0.1 mM, [CB[8]] = 0.05 mM, [LP] = 0.02 wt %,  $\lambda_{ex} = 300$  nm).

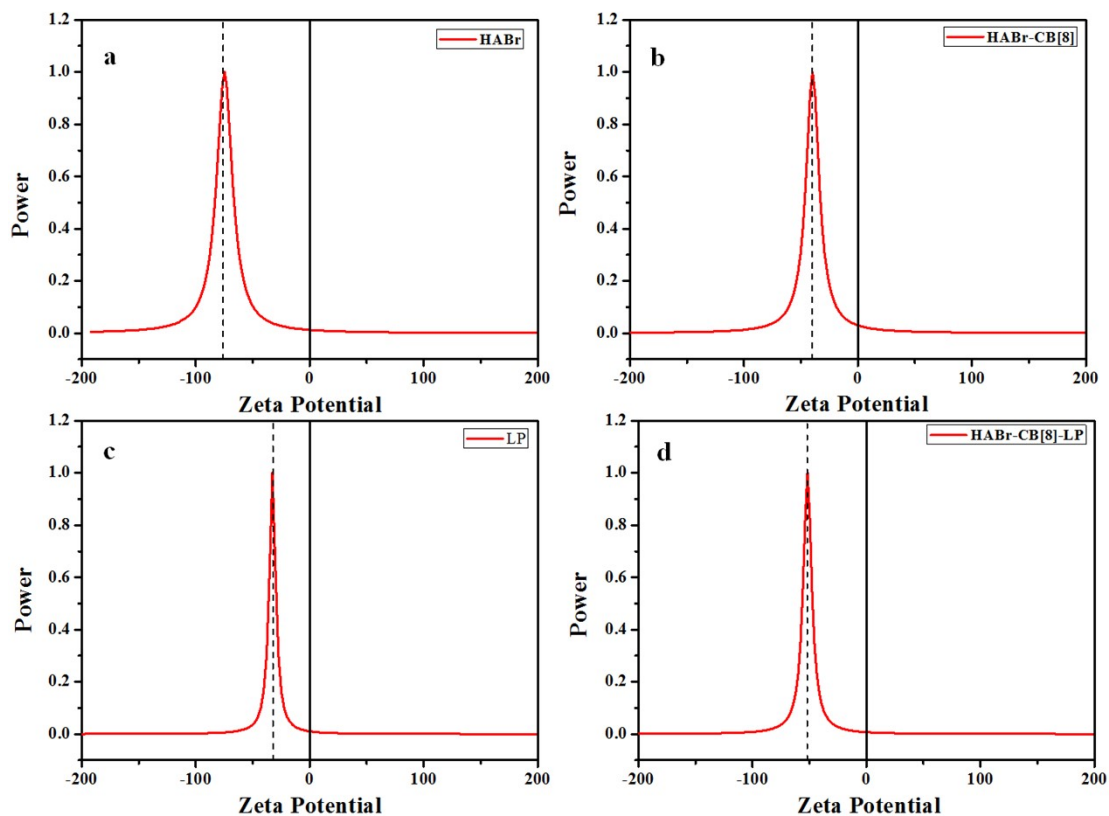

**Fig. S1** Zeta potential results of (a) HABr, (b) HABr/CB[8], (c) LP and (d) HABr/CB[8]/LP ([HABr] = 0.1 mM, [CB[8]] = 0.05 mM, [LP] = 0.02 wt %, 298 K).

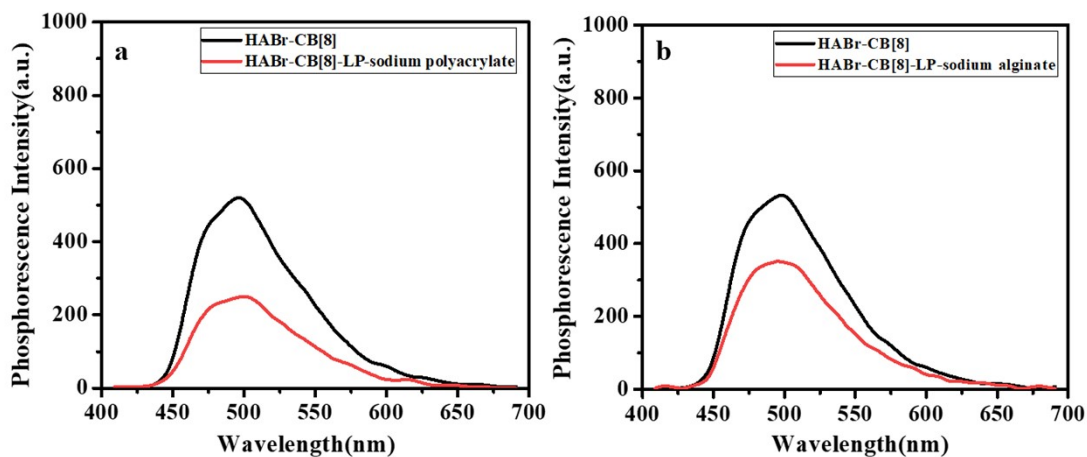

**Fig. S2** Phosphorescence spectra of (a) HABr/CB[8] and HABr/CB[8]/SP/LP(sodium polyacrylate = SP); (b) HABr/CB[8] and HABr/CB[8]/SA/LP(sodium alginate = SA) in water ([HABr] = 0.1 mM, [CB[8]] = 0.05 mM, [LP] = 0.02 wt %, [SP] = 0.02 wt %, [SA] = 0.02 wt %,  $\lambda_{ex}$  = 300 nm).

**a**

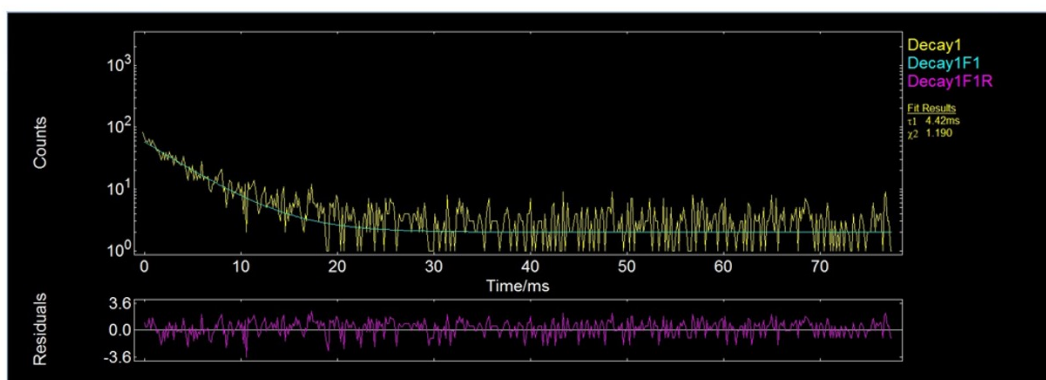

**b**

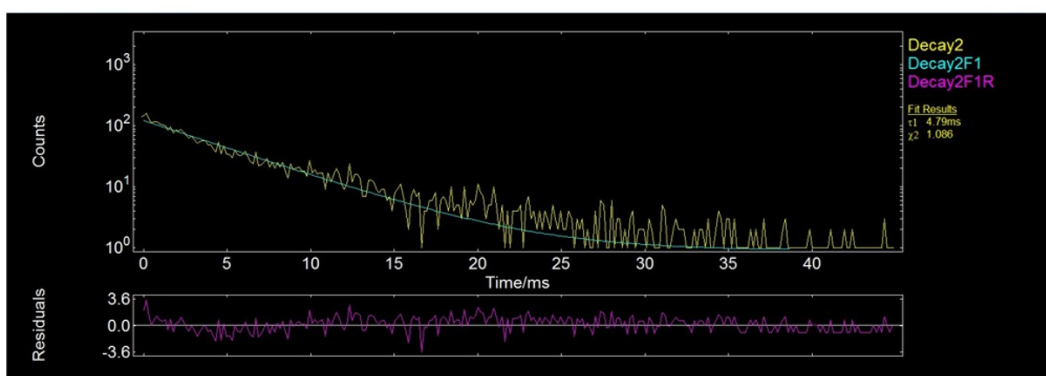

**Fig. S3** Phosphorescence lifetime decay fitting curves of (a) HABr/CB[8] and (b) HABr/CB[8]/LP at 500 nm at 298 K ([HABr] = 0.1 mM, [CB[8]] = 0.05 mM, LP = 0.02 wt %).

**a**

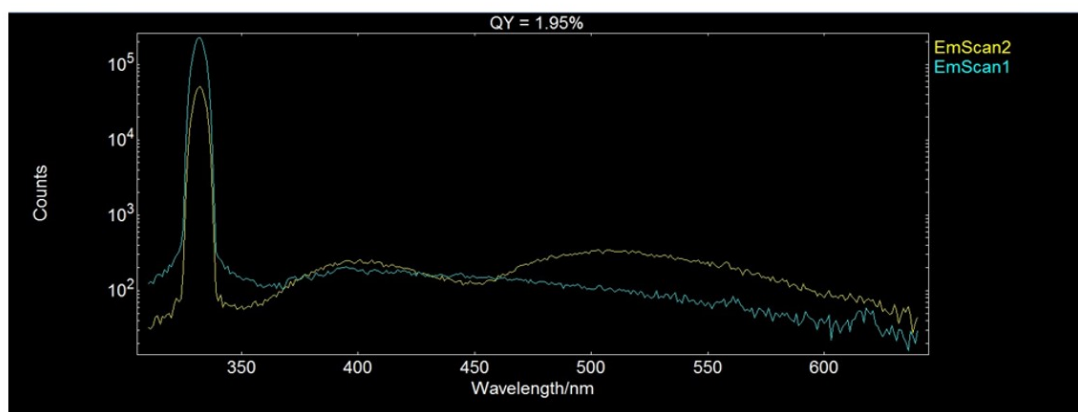

**b**

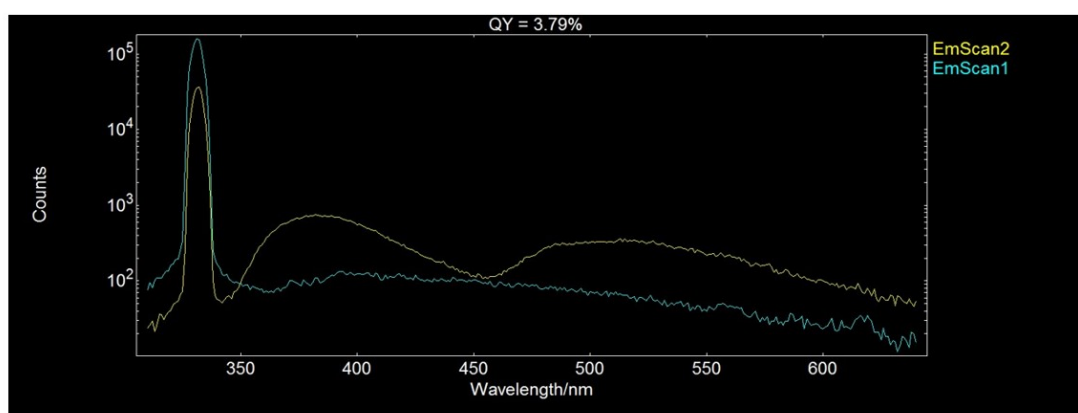

**Fig. S4** The quantum yield of (a) HABr/CB[8] and (b) HABr/CB[8]/LP in aqueous solution ( $[HABr] = 0.1 \text{ mM}$ ,  $[CB[8]] = 0.05 \text{ mM}$ , LP = 0.02 wt %).

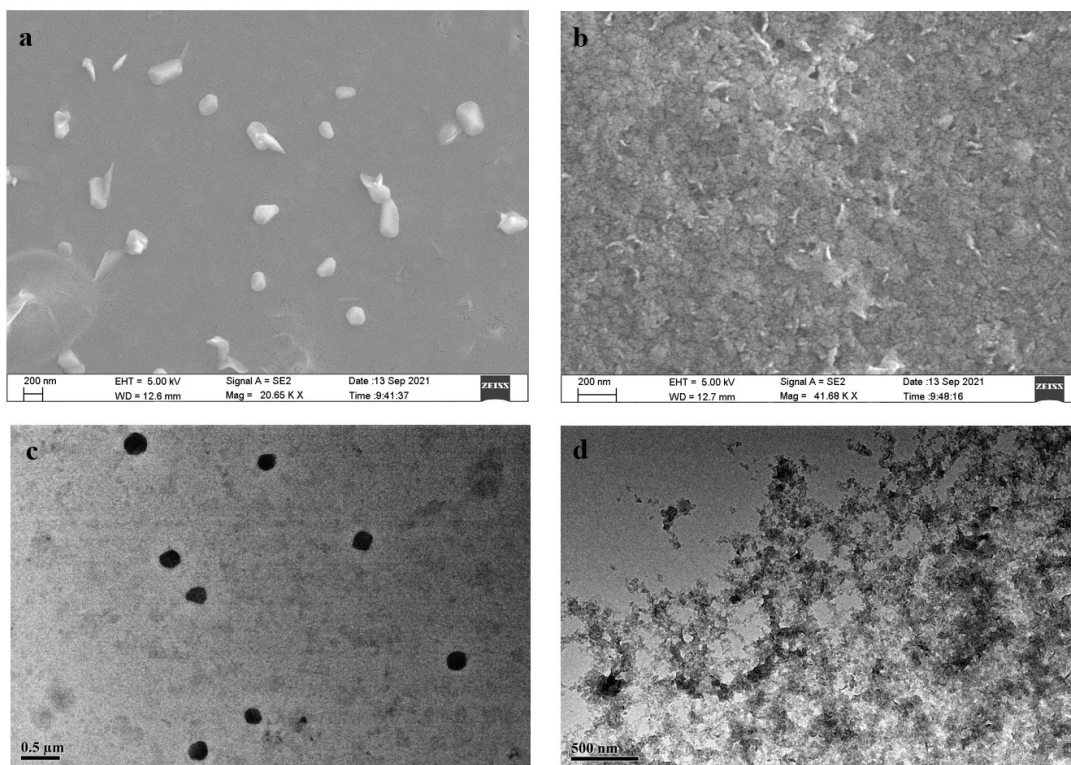

Fig. S5 SEM image of (a) HABr/CB[8], (b) HABr/CB[8]/LP and TEM image of (c) HABr/CB[8], (d) HABr/CB[8]/LP.

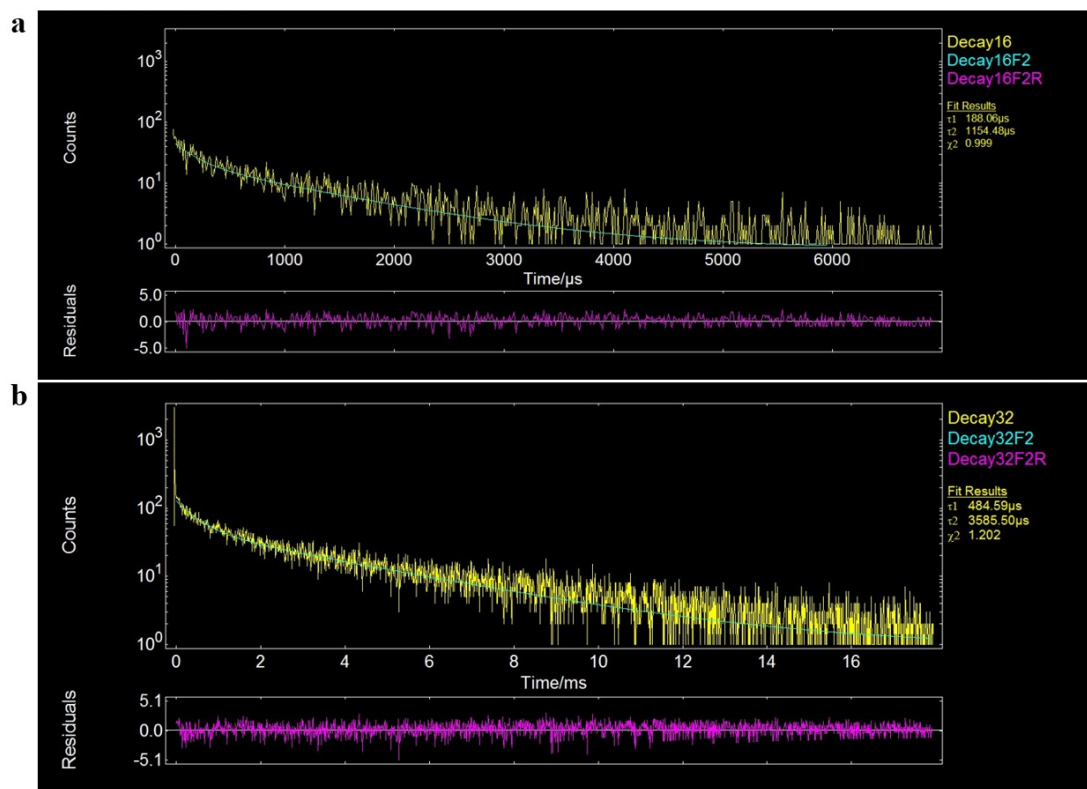

**Fig. S6** Phosphorescence lifetime decay fitting curve of (a) HABr/CB[8]/LP/RhB measured for 500 nm at 298 K and (b) HABr/CB[8]/LP/SR101 measured for 500 nm at 298 K. ([HABr] = 0.1 mM, [CB[8]] = 0.05 mM, LP = 0.02 wt %, [RhB] =  $4.0 \times 10^{-6}$  M, [SR101] =  $1.3 \times 10^{-6}$  M).

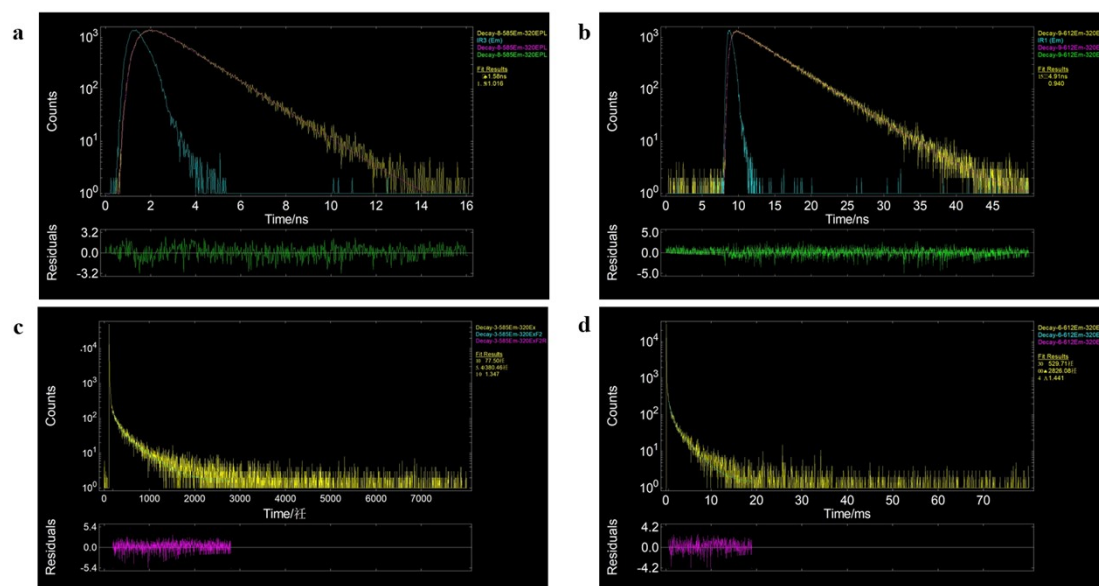

**Fig. S7** Fluorescence lifetime decay fitting curve of (a) RhB, (b) SR101. Phosphorescence lifetime decay fitting curve of (c) HABr/CB[8]/LP/RhB measured for 585 nm at 298 K, (d) HABr/CB[8]/LP/SR101 measured for 612 nm at 298 K. ([HABr] = 0.1 mM, [CB[8]] = 0.05 mM, LP = 0.02 wt %, [RhB] =  $4.0 \times 10^{-6}$  M, [SR101] =  $1.3 \times 10^{-6}$  M).

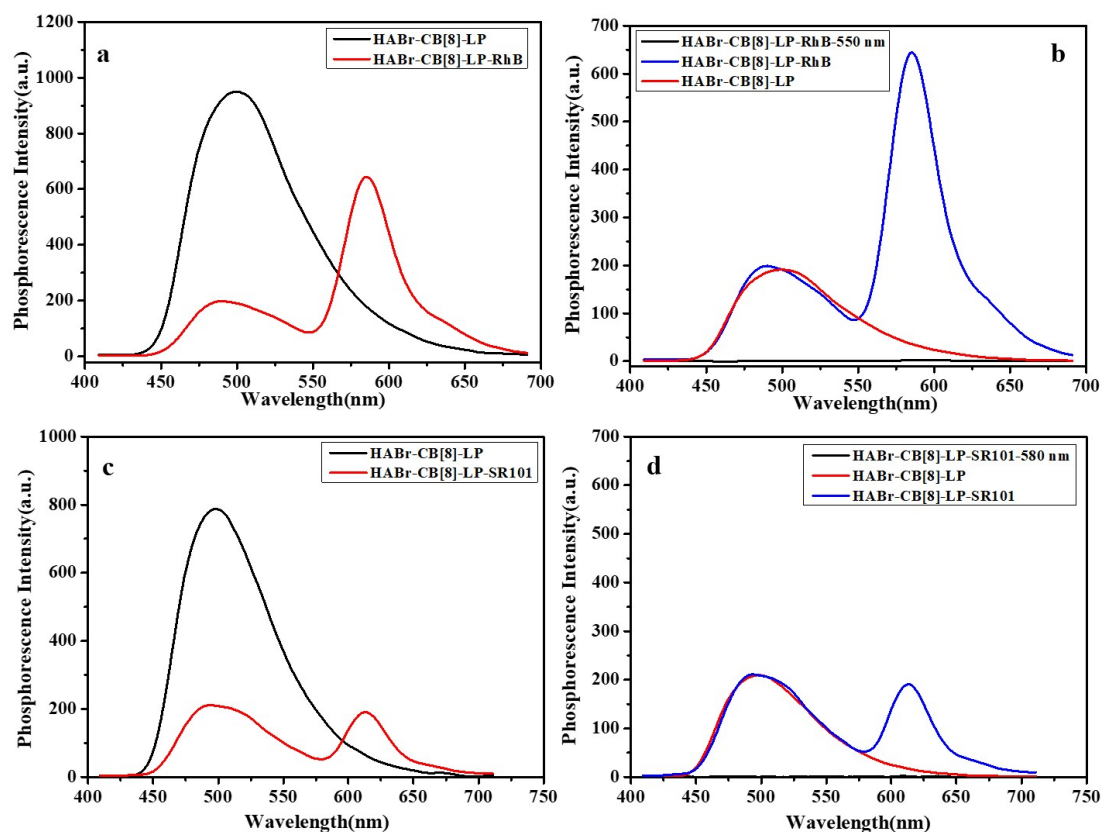



**Fig. S8** Phosphorescence spectra of (a) HABr/CB[8]/LP and HABr/CB[8]/LP/RhB; (c) HABr/CB[8]/LP and HABr/CB[8]/LP/SR101 in water ( $\lambda_{\text{ex}} = 300$  nm). The normalized phosphorescence spectra of (b) HABr/CB[8]/LP (red line,  $\lambda_{\text{ex}} = 300$  nm), HABr/CB[8]/LP/RhB (blue line,  $\lambda_{\text{ex}} = 300$  nm), HABr/CB[8]/LP/RhB (black line,  $\lambda_{\text{ex}} = 550$  nm) and (d) HABr/CB[8]/LP (red line,  $\lambda_{\text{ex}} = 300$  nm), HABr/CB[8]/LP/SR101 (blue line,  $\lambda_{\text{ex}} = 300$  nm), HABr/CB[8]/LP/SR101 (black line,  $\lambda_{\text{ex}} = 580$  nm) in water. ( $[\text{HABr}] = 0.1$  mM,  $[\text{CB}[8]] = 0.05$  mM, LP = 0.02 wt %,  $[\text{RhB}] = 4.0 \times 10^{-6}$  M,  $[\text{SR101}] = 1.3 \times 10^{-6}$  M).

**Table S1.** Energy transfer efficiency ( $\Phi_{\text{ET}}$ ) and antenna effect of RTP reported in the literature.

| name                | $\Phi_{\text{ET}}$ | morphology  | $\tau$ (dye)  | literature |
|---------------------|--------------------|-------------|---------------|------------|
|                     | Antenna<br>Effect  |             |               |            |
| (IPA@EosinY)/LDH    | 99.7%, -           | Solid       | 0.95 ms       | Ref.23     |
| BTA-ME-1            | 81.13%, -          | co-crystals | 1.0 ms        | Ref.24     |
| BTA-ME-2            | 78.97%, -          |             | 0.7 ms        |            |
| CD-PY@CB[8]@RhB     | 84%, 36.42%        | water       | 0.28 ms       | Ref.15     |
| SR101-doped CS-PVA  | 81%, -             | Solid films | 490 ms        | Ref.21a    |
| SRG-doped CS-PVA    | 70%, -             | Solid films | 750 ms        |            |
| CPthBr-LP/SRG       | 32%, -             | water       | 163.5 $\mu$ s | Ref.19     |
| CPthBr-LP/SR101     | 60%, -             |             | 60.4 $\mu$ s  |            |
| HABr/CB[8]/LP/RhB   | 80.0%, 361.6       | water       | 0.31 ms       | This work  |
| HABr/CB[8]/LP/SR101 | 73.4%, 307.5       |             | 2.10 ms       |            |

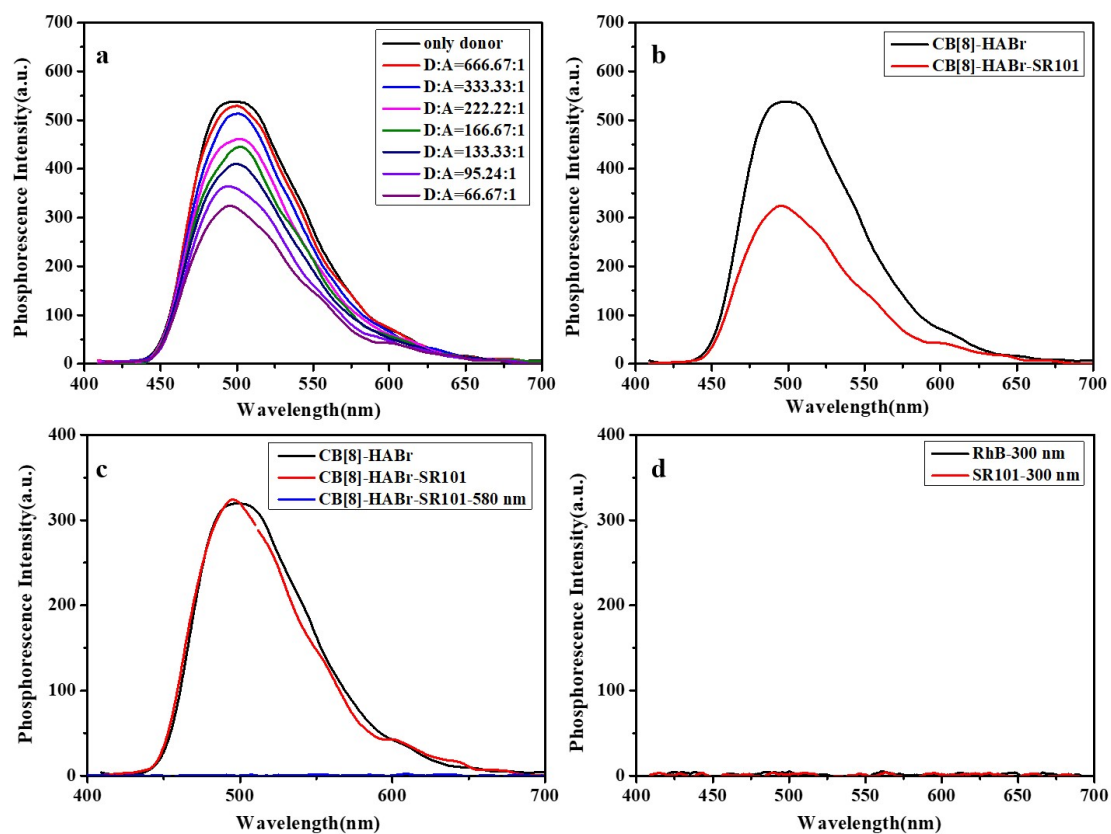

**Fig. S9** (a) Phosphorescence spectrum (delayed 0.2 ms) of HABr/CB[8] in aqueous solution with different concentrations of SR101. Phosphorescence spectra of (b) HABr/CB[8] and HABr/CB[8]/SR101. The normalized phosphorescence spectra of (c) HABr/CB[8] (red line,  $\lambda_{\text{ex}} = 300$  nm), HABr/CB[8]/SR101 (red line,  $\lambda_{\text{ex}} = 300$  nm), HABr/CB[8]/SR101 (black line,  $\lambda_{\text{ex}} = 580$  nm). (d) Phosphorescence spectrum (delayed 0.2 ms) of RhB and SR101 in aqueous solution. ([HABr] = 0.1 mM, [CB[8]] = 0.05 mM, [SR101] =  $1.3 \times 10^{-6}$  M,  $\lambda_{\text{ex}} = 300$  nm, 298 K).

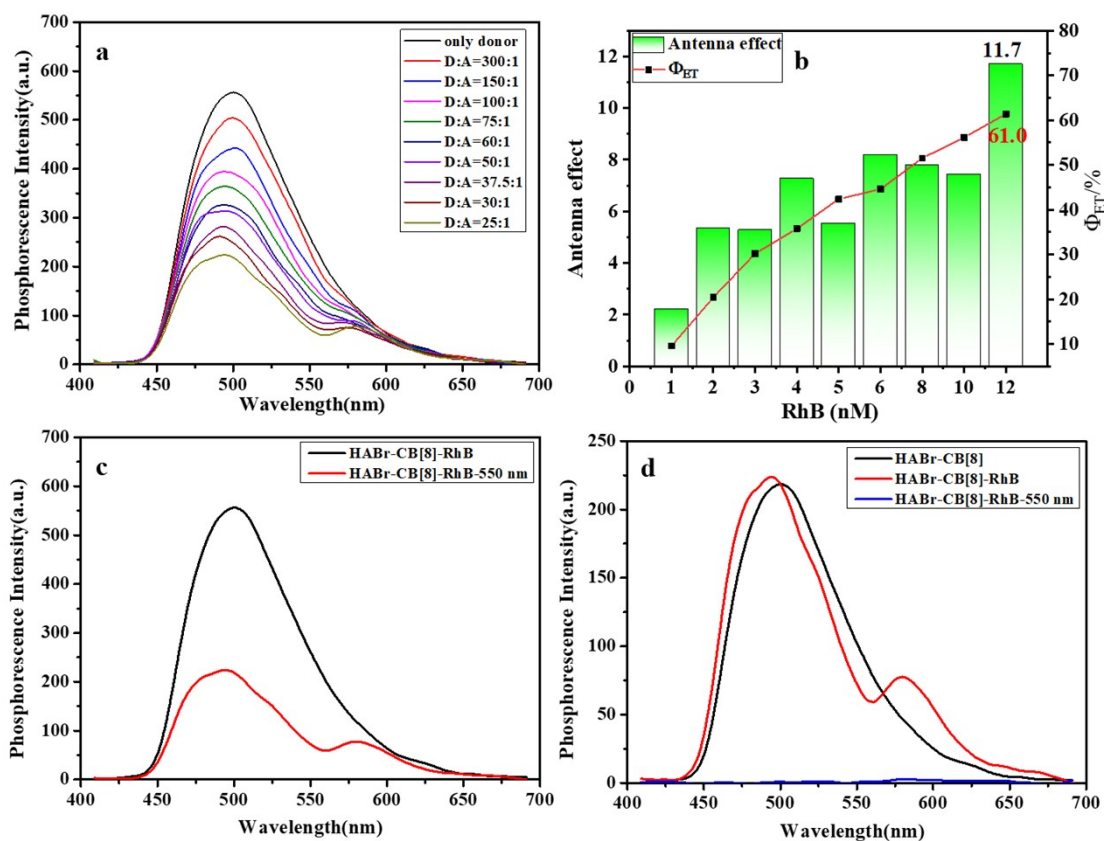

**Fig. S10** (a) Phosphorescence spectrum (delayed 0.2 ms) and (b) Antenna effect/ $\Phi_{ET}$  of HABr/CB[8] in aqueous solution with different concentrations of RhB. Phosphorescence spectra of (c) HABr/CB[8] and HABr/CB[8]/RhB. The normalized phosphorescence spectra of (d) HABr/CB[8] (red line,  $\lambda_{ex} = 300$  nm), HABr/CB[8]/RhB (red line,  $\lambda_{ex} = 300$  nm), HABr/CB[8]/RhB (black line,  $\lambda_{ex} = 550$  nm). ([HABr] = 0.1 mM, [CB[8]] = 0.05 mM, [RhB] =  $4.0 \times 10^{-6}$  M,  $\lambda_{ex} = 300$  nm, 298 K).

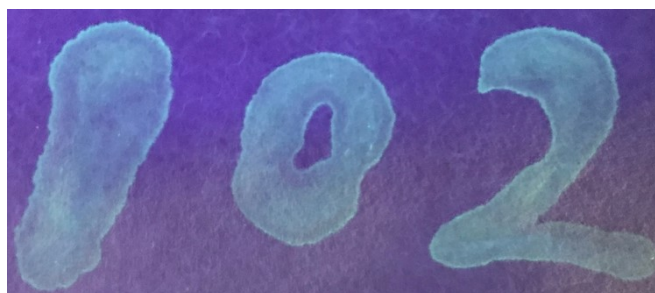

**Fig. S11** The photographs writing "102" with HABr/CB[8]/0.005SR101 on the filter paper under UV light.

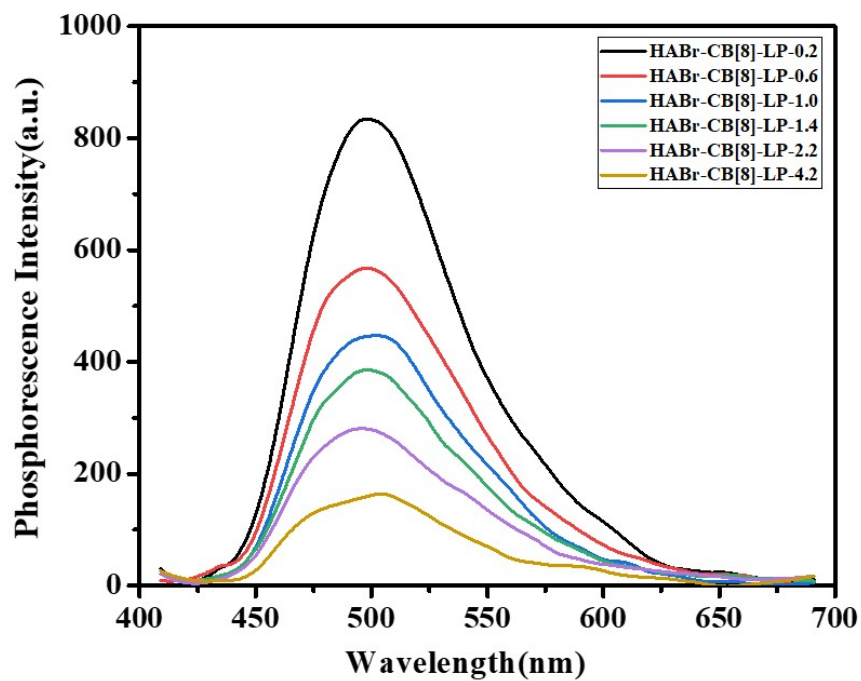

**Fig. S12** Phosphorescence spectra of HABr/CB[8]/LP at different delay times for 0.2 ms, 0.6 ms, 1.0 ms, 1.4 ms, 2.2 ms, 4.2 ms, respectively in water at 298 K (Ex. Slit = 5 nm, Em. Slit = 10 nm, [HABr] = 0.1 mM, [CB[8]] = 0.05 mM, [LP] = 0.02 wt %,  $\lambda_{\text{ex}}$  = 300 nm).
